# Supplementary material
Source: ML conference proceedings conference paper supplement (https://openaccess.thecvf.com/content/WACV2025/html/Pesonen_Detecting_Wildfires_on_WACV_2025_paper.html)
Supplement: Supplementary file 1 [file Pesonen_Detecting_Wildfires_on_WACV_2025_supplemental.pdf]

## Appendix

The additional binary metrics used in Table 2:

$$Accuracy = \frac{TP + TN}{P + N} \quad (3)$$

$$Precision = \frac{TP}{TP + FP} \quad (4)$$

$$Recall = \frac{TP}{TP + FN} \quad (5)$$

$$F_1 = \frac{2TP}{2TP + FP + FN}, \quad (6)$$

where  $P$  and  $N$  denote positive and negative ground truth values and  $TP$ ,  $TF$ ,  $FP$ , and  $FN$  denote the corresponding true and false predictions.

| Input                                                                               | GT                                                                                  | ResNet-50                                                                           | PIDNet-S                                                                             | PIDNet-M                                                                              | PIDNet-L                                                                              |
|-------------------------------------------------------------------------------------|-------------------------------------------------------------------------------------|-------------------------------------------------------------------------------------|--------------------------------------------------------------------------------------|---------------------------------------------------------------------------------------|---------------------------------------------------------------------------------------|
|    |    |    |    |    |    |
|    |    |    |    |    |    |
|    |    |    |    |    |    |
|   |   |   |   |   |   |
|  |  |  |  |  |  |
|  |  |  |  |  |  |
|  |  |  |  |  |  |
|  |  |  |  |  |  |

Table 9. Visualisation of outputs obtained using the BoxSnake supervised ResNet-50 and the corresponding distilled PIDNet models.

| Input                                                                               | GT                                                                                  | ResNet-101                                                                          | PIDNet-S                                                                             | PIDNet-M                                                                              | PIDNet-L                                                                              |
|-------------------------------------------------------------------------------------|-------------------------------------------------------------------------------------|-------------------------------------------------------------------------------------|--------------------------------------------------------------------------------------|---------------------------------------------------------------------------------------|---------------------------------------------------------------------------------------|
|    |    |    |    |    |    |
|    |    |    |    |    |    |
|    |    |    |    |    |    |
|   |   |   |   |   |   |
|  |  |  |  |  |  |
|  |  |  |  |  |  |
|  |  |  |  |  |  |
|  |  |  |  |  |  |

Table 10. Visualisation of outputs obtained using the BoxSnake supervised ResNet-101 and the corresponding distilled PIDNet models.

| Input                                                                               | GT                                                                                  | Swin-B                                                                              | PIDNet-S                                                                             | PIDNet-M                                                                              | PIDNet-L                                                                              |
|-------------------------------------------------------------------------------------|-------------------------------------------------------------------------------------|-------------------------------------------------------------------------------------|--------------------------------------------------------------------------------------|---------------------------------------------------------------------------------------|---------------------------------------------------------------------------------------|
|    |    |    |    |    |    |
|    |    |    |    |    |    |
|    |    |    |    |    |    |
|   |   |   |   |   |   |
|  |  |  |  |  |  |
|  |  |  |  |  |  |
|  |  |  |  |  |  |
|  |  |  |  |  |  |

Table 11. Visualisation of outputs obtained using the BoxSnake supervised Swin-B and the corresponding distilled PIDNet models.

| Input                                                                               | GT                                                                                  | Swin-L                                                                              | PIDNet-S                                                                             | PIDNet-M                                                                              | PIDNet-L                                                                              |
|-------------------------------------------------------------------------------------|-------------------------------------------------------------------------------------|-------------------------------------------------------------------------------------|--------------------------------------------------------------------------------------|---------------------------------------------------------------------------------------|---------------------------------------------------------------------------------------|
|    |    |    |    |    |    |
|    |    |    |    |    |    |
|    |    |    |    |    |    |
|   |   |   |   |   |   |
|  |  |  |  |  |  |
|  |  |  |  |  |  |
|  |  |  |  |  |  |
|  |  |  |  |  |  |

Table 12. Visualisation of outputs obtained using the BoxSnake supervised Swin-L and the corresponding distilled PIDNet models.

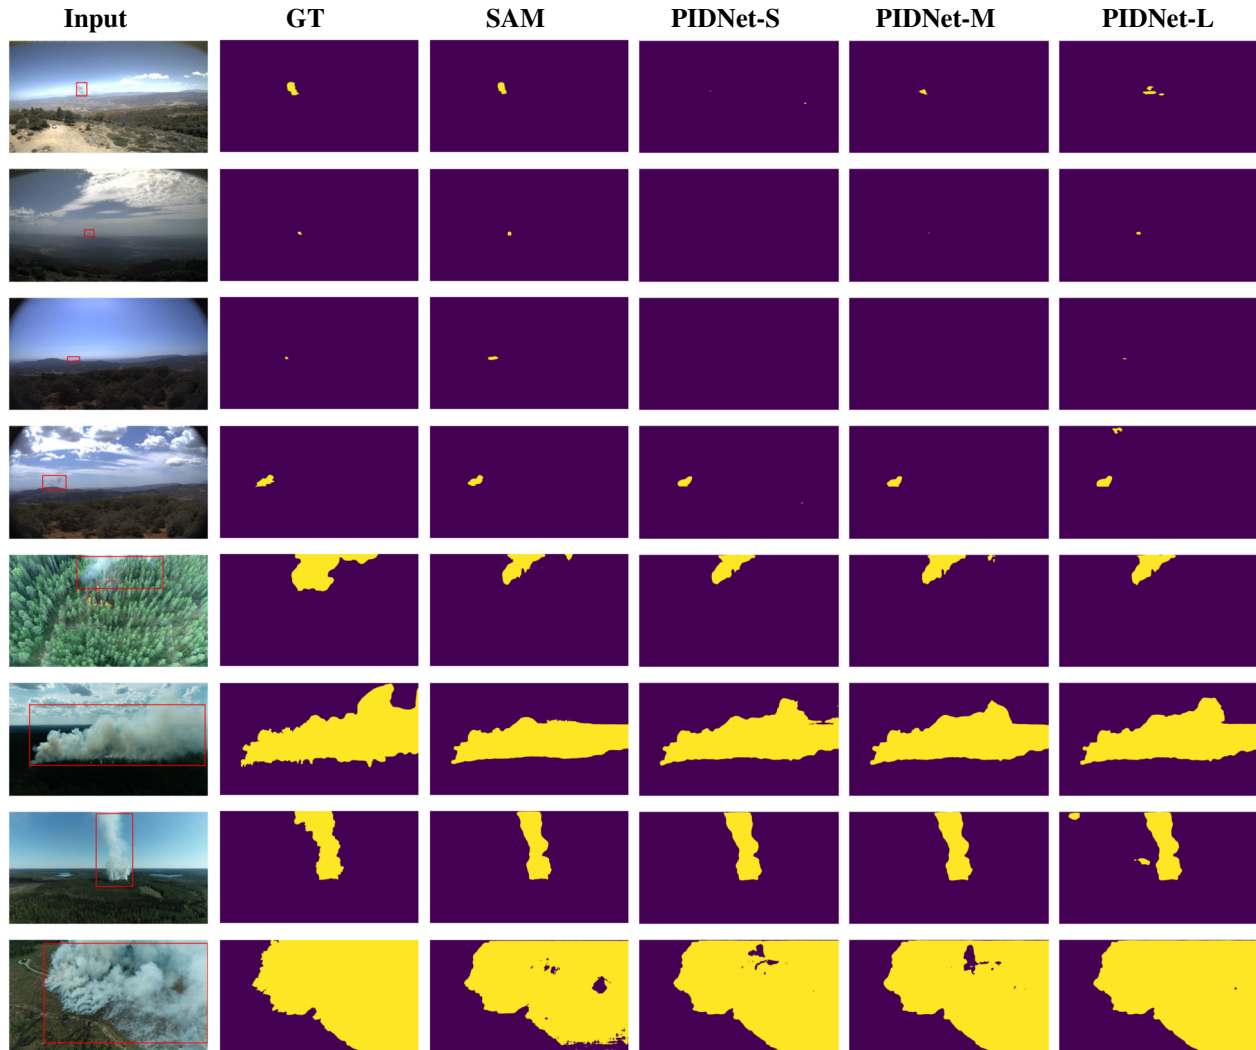

Table 13. Visualisation of outputs obtained using SAM and the corresponding distilled PIDNet models.

| Device        | CPU  |      |      |      | GPU  |      |      |       |       |       |       |       |
|---------------|------|------|------|------|------|------|------|-------|-------|-------|-------|-------|
|               | -    |      |      |      | No   |      |      |       | Yes   |       |       |       |
| TensorRT      |      |      |      |      |      |      |      |       |       |       |       |       |
| Power setting | 10W  | 15W  | 25W  | MAX  | 10W  | 15W  | 25W  | MAX   | 10W   | 15W   | 25W   | MAX   |
| Model         | FPS  |      |      |      |      |      |      |       |       |       |       |       |
| PIDNet-S      | 1.22 | 1.40 | 1.32 | 1.71 | 6.31 | 6.25 | 6.19 | 12.47 | 10.90 | 10.77 | 11.97 | 25.88 |
| PIDNet-M      | 0.47 | 0.54 | 0.70 | 0.88 | 2.89 | 2.79 | 2.83 | 5.44  | 4.65  | 4.39  | 5.25  | 9.86  |
| PIDNet-L      | 0.32 | 0.37 | 0.53 | 0.63 | 2.17 | 2.18 | 2.17 | 4.29  | 3.35  | 3.37  | 3.96  | 7.47  |

Table 14. PIDNet model frame rate benchmark on the NVIDIA Jetson Orin NX computer with different power supply limitation, GPU, CPU and TensorRT options. With the GPU the inputs and outputs were  $1080 \times 1920$  pixels and all operations were computed in full precision (32-bit float). For the CPU, images with a resolution of  $576 \times 1024$  were used. With the  $1080 \times 1920$  resolution the fps was always below 1. The specifications of the different power settings are shown in Table 15.

| Power Budget                   | MAXN  | 10W    | 15W    | 25W    |
|--------------------------------|-------|--------|--------|--------|
| Online CPU                     | 8     | 4      | 4      | 8      |
| CPU Max Frequency (MHz)        | 1984  | 1190.4 | 1420.8 | 1497.6 |
| GPU Max Frecuency (MHz)        | 918   | 612    | 612    | 408    |
| DLA cores                      | 2     | 1      | 1      | 2      |
| DLA Core Max Frequency (MHz)   | 614.4 | 153.6  | 614.4  | 614.4  |
| DLA Falcon Max Frequency (MHz) | 614.4 | 153.6  | 614.4  | 614.4  |
| PVA Cores                      | 1     | 0      | 0      | 1      |
| PVA VPS Max Frequency (MHz)    | 704   | N/A    | N/A    | 512    |
| PVA AXI Max Frequency (MHz)    | 486.4 | N/A    | N/A    | 358.4  |

Table 15. The specifications of the different NVIDIA Jetson Orin NX power settings [40].

| Teacher             | Student  | mIoU         | Accuracy     | Precision    | Recall       | $F_1$        |
|---------------------|----------|--------------|--------------|--------------|--------------|--------------|
| ResNet-50-RCNN-FPN  | PIDNet-S | 0.444        | 0.855        | 0.690        | 0.585        | 0.561        |
| ResNet-101-RCNN-FPN | PIDNet-S | 0.437        | 0.857        | <b>0.841</b> | 0.499        | 0.572        |
| Swin-B-FPN          | PIDNet-S | <u>0.472</u> | <b>0.874</b> | 0.735        | <u>0.600</u> | <u>0.585</u> |
| Swin-L-FPN          | PIDNet-S | <b>0.482</b> | <u>0.873</u> | 0.749        | <b>0.629</b> | <b>0.607</b> |
| SAM                 | PIDNet-S | 0.410        | 0.848        | <u>0.824</u> | 0.481        | 0.534        |
| ResNet-50-RCNN-FPN  | PIDNet-M | <b>0.460</b> | <b>0.867</b> | 0.750        | <b>0.601</b> | <b>0.586</b> |
| ResNet-101-RCNN-FPN | PIDNet-M | 0.452        | 0.855        | 0.774        | <u>0.542</u> | 0.575        |
| Swin-B-FPN          | PIDNet-M | 0.406        | 0.857        | 0.737        | 0.512        | 0.525        |
| Swin-L-FPN          | PIDNet-M | <u>0.454</u> | <b>0.867</b> | <u>0.822</u> | 0.509        | <u>0.582</u> |
| SAM                 | PIDNet-M | 0.374        | 0.832        | <b>0.867</b> | 0.406        | 0.502        |
| ResNet-50-RCNN-FPN  | PIDNet-L | <b>0.513</b> | <b>0.882</b> | <u>0.807</u> | <u>0.588</u> | <b>0.637</b> |
| ResNet-101-RCNN-FPN | PIDNet-L | 0.410        | 0.845        | 0.799        | 0.486        | 0.538        |
| Swin-B-FPN          | PIDNet-L | <u>0.507</u> | <u>0.881</u> | 0.796        | 0.593        | <u>0.633</u> |
| Swin-L-FPN          | PIDNet-L | 0.463        | 0.862        | 0.696        | <b>0.630</b> | 0.584        |
| SAM                 | PIDNet-L | 0.479        | 0.873        | <b>0.823</b> | 0.552        | 0.614        |

Table 16. Test set metrics of the different student models on the Croatian Center for Wildfire Research data. In all metrics higher is better. All teacher models besides SAM were trained using BoxSnake. The best results for each student model are in bold and the second best are underlined.

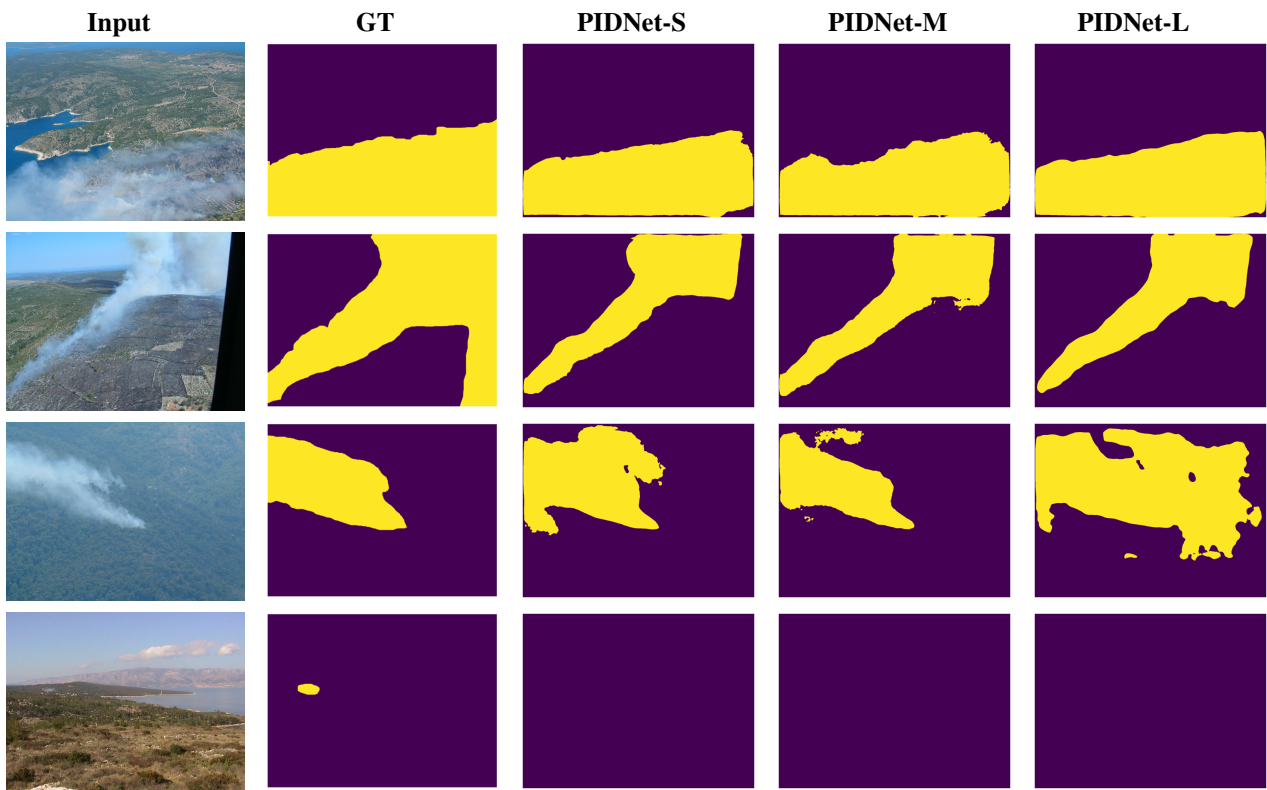

Table 17. Qualitative results of smoke predictions obtained on the Croatian Center for Wildfire Research data using the different SAM supervised models.
